# Supplementary material for: Variation in Soil Microbial Communities Along an Elevational Gradient in Alpine Meadows of the Qilian Mountains, China
Source: Front Microbiol. 2021 Jun 25;12:684386. doi: 10.3389/fmicb.2021.684386 (PMC8270674; doi:10.3389/fmicb.2021.684386)
Supplement: Supplementary file 3 [file Table_2.xlsx]

## Sheet: Sheet1
Phylum	SHX_007	SHX_008	SHX_009	SHX_010	SHX_011	SHX_012	SHX_013	SHX_014	SHX_015	SHX_016	SHX_017	SHX_018	SHX_019	SHX_020	Total reads
Thaumarchaeota	10485	8448	16167	15770	16191	14561	13570	16585	16921	15110	15003	15256	9510	15998	199575
unclassified_norank_Archaea	17	700	894	1698	1292	1591	3515	721	613	1801	2441	2128	7818	1528	26757
Euryarchaeota	6878	8409	472	84	53	1387	461	226	7	645	106	160	225	21	19134
Nanoarchaeaeota	181	4	26	6	25	22	15	29	20	5	9	17	6	14	379
Crenarchaeota	0	0	0	3	0	0	0	0	0	0	2	0	2	0	7
Asgardaeota	0	0	2	0	0	0	0	0	0	0	0	0	0	0	2
